# Supplementary material
Source: HighWire-hosted journal article supplement (https://bmjopen.bmj.com/content/10/7/e034970)
Supplement: inline-supplementary-material-1 [file inline-supplementary-material-1.pdf]

## Supplementary Material

A.Youssef

### **Appendix.1** Sample Questions from the Interview Guide

1. Could you tell me a bit about your current health conditions?
2. Although we might disagree with a given diagnosis, I am wondering if you have ever received a diagnosis for any mental health issues such as drugs, alcohol, addiction, anxiety, depression, bipolar, mood disorder, or any other?
3. How long have you been receiving care in this healthcare setting?
4. How many specialists are involved in your care?
5. How would you describe collaboration between your care team members? (why)
6. What is your understanding of the coordination of care between your primary care provider (PCP) and psychiatrist?
7. When you see one of your specialists', are they aware of the recent changes in both your mental [depression] and physical condition [diabetes]?
8. What other non-medical services (if any) in this program did you find to be helpful? Why?
9. What makes you to seek care at this setting compared to other primary care practices in the community?
10. What has/would make you feel at the center of your care (needs and concerns are addressed by your healthcare team)?
