# Supplementary material
Source: HighWire-hosted journal article supplement (https://bmjopen.bmj.com/content/10/7/e034970)
Supplement: inline-supplementary-material-2 [file inline-supplementary-material-2.pdf]

## Supplementary Material

## Appendix 2

**Appendix 2: Nvivo Coding Scheme**

- ▼ ● Being at the Centre of Care
  - ▼ ● Caring about me (Journeying with Me)
    - ▶ ● Accepting and Respecting Patient's Journey
      - Assuring patient concerns
      - Attentively Listening to Me
    - ▶ ● Being Open and Non-judgemental
      - Caring about my success
      - Taking a vested interest in the whole story
  - ▼ ● Focusing on me
    - Being connected
    - ▶ ● Experiencing a sense of Belonging
      - Feeling assured having provider X
      - Finding a voice that people listen to (Stepping up for Me)
      - Getting to know me (Team-Driven)
      - Grounding me during distress
      - Having regular access to provider X
      - Providing meaningful self-management tips
    - ▶ ● Supporting me
  - ▼ ● Leveraging their knowledge and expertise to empower patients
    - Explaining and Walking you through the steps
    - ▶ ● Having the Knowledge
      - professional
    - Personalizing care to address individual needs

Supplementary Material  
Appendix 2

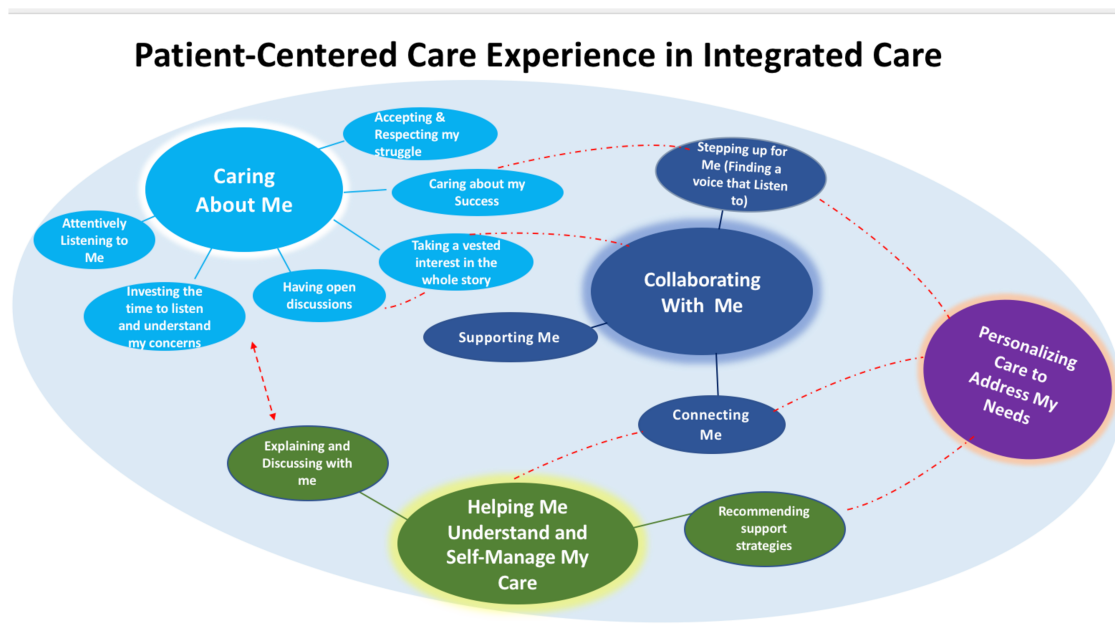

This mind map diagram outlines the connection between high level themes (categories) and the underpinning codes involved in constructing the “Caring About Me” framework in Fig A.1
